# Supplementary material
Source: publisher figshare collection journal article supplement (https://plos.figshare.com/articles/dataset/_/128083)
Supplement: Supplementary file 1 [file 1]

Archive with 10 entries (10 files):
- Video_S1.mpeg
- Video_S2.mpeg
- Video_S3.mpeg
- Video_S4.mpeg
- Video_S5.mpeg
- Figure_S1.pdf
- Figure_S2.pdf
- Figure_S3.pdf
- Figure_S4.pdf
- Figure_S5.pdf
