# Supplementary material
Source: publisher figshare collection journal article supplement (https://plos.figshare.com/articles/dataset/_/128083)
Supplement: Supplementary file 1 [file 1 › Figure_S2.pdf]

**Figure S2 Expression of ChR2V in the spinal cord and the motor nerve terminals.**

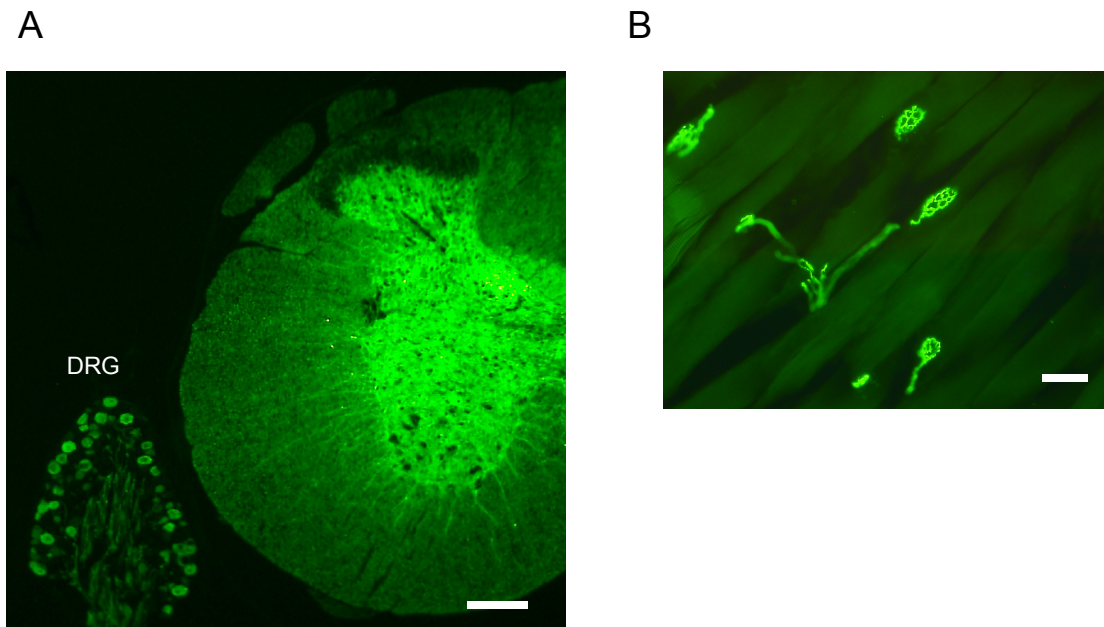

**A.** Transverse slices of spinal cord were immunohistochemically studied using anti-EGFP antibody with the Alexa Fluor 488-conjugated secondary anti-rabbit IgG. Note that the spinal motor neurons are expressed with ChR2V in the membrane of soma and axons. Scale, 200  $\mu\text{m}$ . **B.** Intercostal muscle. The motor nerve terminals are expressing ChR2V. Scale, 50  $\mu\text{m}$ .
