# Supplementary material
Source: publisher figshare collection journal article supplement (https://plos.figshare.com/articles/dataset/_/128083)
Supplement: Supplementary file 1 [file 1 › Figure_S3.pdf]

**Figure S3 Non-fluorescent DRG neurons were unresponsive to the blue light.**

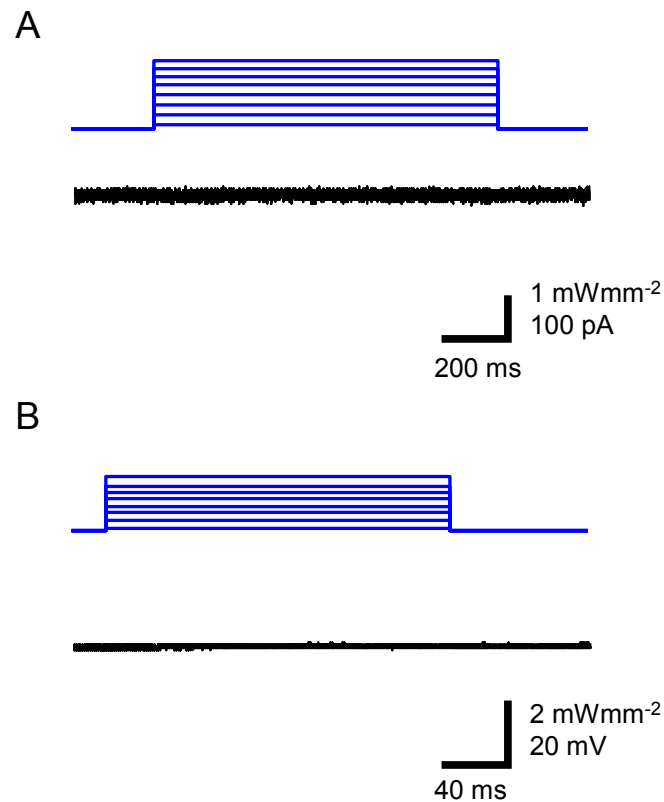

**A.** Sample records of photocurrents (bottom) during blue LED light pulses (1 s) of variable strength (top) under voltage clamp. **B.** The membrane potential during the blue LED pulses (200 ms) of variable strength under current clamp. From the same neuron in A. The resting membrane potential, -59 ~ -63 mV.
