# Supplementary material
Source: publisher figshare collection journal article supplement (https://plos.figshare.com/articles/dataset/_/128083)
Supplement: Supplementary file 1 [file 1 › Figure_S4.pdf]

**Figure S4** The primers that were used to differentiate ChR2V+ from ChR2V- rats..

Venus-F: 5'-ATGGTGAGCAAGGGCGAGGAGCTGT-3' (25-mer)

Venus-R: 5'-TTACTTGTACAGCTCGTCCATGCCGA-3' (26-mer)
