# Supplementary material
Source: publisher figshare collection journal article supplement (https://plos.figshare.com/articles/dataset/_/128083)
Supplement: Supplementary file 1 [file 1 › Figure_S5.pdf]

**Figure S5 Expression of ChR2V in the tail nerve bundles.**

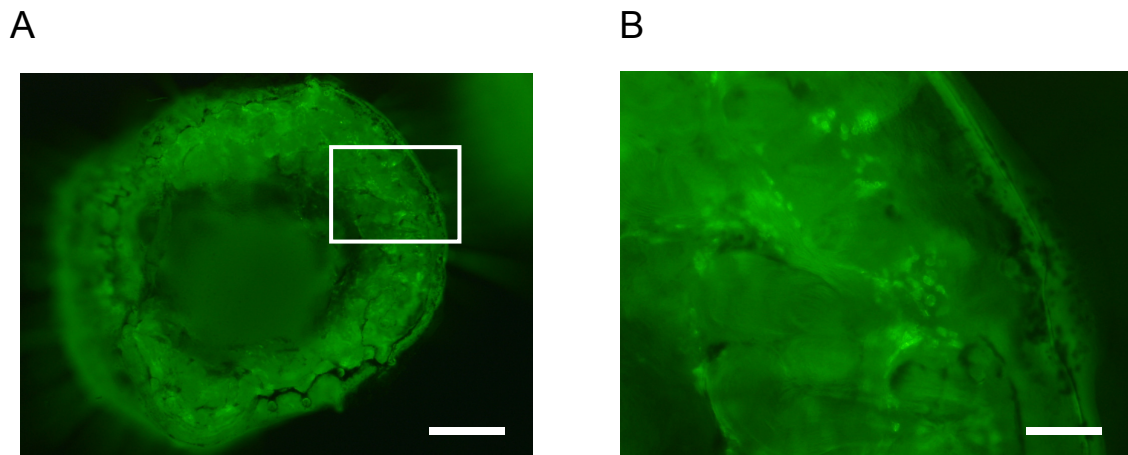

**A.** The Venus fluorescence in a fresh cross section of the tail of a 3-weeks old W-TChR2V4 rat. **B.** Enlarged view of the region indicated by a square in A. Note that the nerve bundles are fluorescent. Scale bars, 400  $\mu\text{m}$  (A) and 100  $\mu\text{m}$  (B).
